# Supplementary material for: Determinants of the Usage of Splice-Associated cis-Motifs Predict the Distribution of Human Pathogenic SNPs
Source: PubMed Central journal article supplement (PMC4866546; doi:10.1093/molbev/msv251), 2015-11-05

## Supplementary Fig. S1.

Distribution of all pathogenic SNPs (nonsense, missense and silent mutations) in internal exons

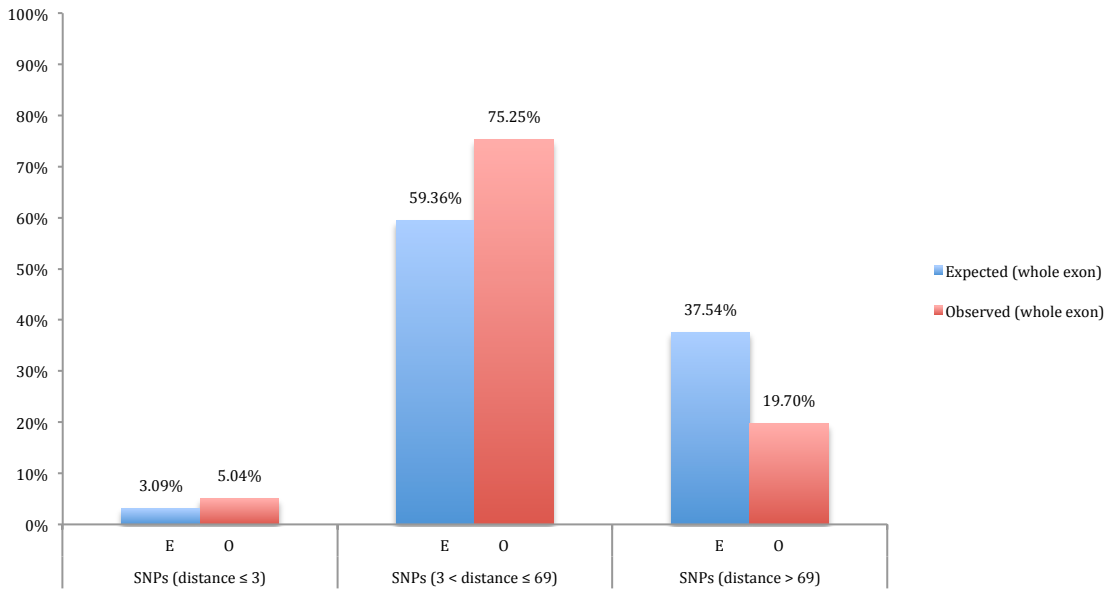

Supplement: supp_msv251_supplementary_fig_S1.pdf [file supp_msv251_supplementary_fig_S1.pdf]
